# Supplementary material for: Newspaper coverage of advance care planning during the COVID-19 pandemic: Content analysis
Source: PubMed Central journal article supplement — Death Stud. Author manuscript; Available in PMC 2024 Feb 16. (PMC10491734; doi:10.1080/07481187.2023.2180693), 2023-03-09
Supplement: NIHMS1896006-supplement-Supplemental_file_1.pdf [file NIHMS1896006-supplement-Supplemental_file_1.pdf]

## Supplemental file 1

### *Search strategy*

Newspaper articles on advance care planning and COVID-19<sup>1</sup>:

(Advance-care-planning AND (COVID-19 OR Corona OR COVID19 OR 2019-ncov OR 2019ncov OR nCoV-2019 OR 2019-novel-coronavirus\* OR Coronavirus-Disease-2019 OR Corona-virus-Disease-2019 OR Coronavirus-Disease-19 OR Corona-virus-Disease-19 OR SARS-CoV-2 OR sars2 OR sars-2 OR severe-acute-respiratory-syndrome-cov-2 OR severe-acute-respiratory-syndrome-cov2))

Total number of newspaper articles on advance care planning in 2019 vs. 2020<sup>2</sup>:

(Advance-care-planning)

<sup>1</sup>Search performed in LexisNexis Uni from 1 January 2020 to 4 November 2020.

<sup>2</sup>Search performed in LexisNexis Uni from 1 January 2019 to 31 December 2019 and from 1 January 2020 to 4 November 2020.

Link to LexisNexis Uni: <https://advance.lexis.com/bisacademicresearchhome?crd=fb55e0bd-55e8-4a55-962e-0deb838ace3f&pdmfid=1516831&pdisurlapi=true>
