# Supplementary material for: Newspaper coverage of advance care planning during the COVID-19 pandemic: Content analysis
Source: PubMed Central journal article supplement — Death Stud. Author manuscript; Available in PMC 2024 Feb 16. (PMC10491734; doi:10.1080/07481187.2023.2180693), 2023-03-09
Supplement: NIHMS1896006-supplement-Supplemental_file_2.pdf [file NIHMS1896006-supplement-Supplemental_file_2.pdf]

## Supplemental file 2

### Overview of the type of newspapers

| Country (number of articles)    | Type of newspaper                 | Number of articles |
|---------------------------------|-----------------------------------|--------------------|
| United Kingdom (n=59)           | <b>National</b>                   | 31                 |
|                                 | <i>Quality</i>                    | 16                 |
|                                 | The Independent                   | 3                  |
|                                 | The Independent Daily Edition     | 2                  |
|                                 | The Guardian                      | 2                  |
|                                 | The Times (London)                | 2                  |
|                                 | Financial Times                   | 1                  |
|                                 | The Sunday Times (London)         | 1                  |
|                                 | The Observer                      | 1                  |
|                                 | I-Independent Print               | 1                  |
|                                 | The Sunday Telegraph              | 1                  |
|                                 | The Conversation                  | 1                  |
|                                 | Telegraph.co.uk (Daily Telegraph) | 1                  |
|                                 | <i>Middle market</i>              | 5                  |
|                                 | Mail Online (Daily Mail)          | 3                  |
|                                 | Daily Mail (London)               | 1                  |
|                                 | The Express (Daily Express)       | 1                  |
|                                 | <i>Tabloid</i>                    | 10                 |
|                                 | Mirror.co.uk (Mirror)             | 5                  |
|                                 | Daily Mirror (Mirror)             | 3                  |
|                                 | Mirror Publications (Mirror)      | 1                  |
|                                 | TheSun.co.uk                      | 1                  |
|                                 | <b>Regional</b>                   | 28                 |
|                                 | Manchester Evening News           | 3                  |
|                                 | London Evening Standard           | 3                  |
|                                 | Belfast Telegraph                 | 3                  |
|                                 | Belfast Telegraph Online          | 3                  |
|                                 | Scottish Daily Mail               | 2                  |
|                                 | Romford Recorder                  | 1                  |
|                                 | York Press                        | 1                  |
|                                 | Batley & Birstall News            | 1                  |
| The Huddersfield Daily Examiner | 1                                 |                    |
| Express and Star                | 1                                 |                    |
| Examiner.co.uk                  | 1                                 |                    |
| Getreading.co.uk                | 1                                 |                    |
| The Courier                     | 1                                 |                    |
| Somerset County Gazette         | 1                                 |                    |
| South Wales Argus               | 1                                 |                    |
| The Argus                       | 1                                 |                    |
| Kent and Sussex Courier         | 1                                 |                    |
| Swindon Advertiser              | 1                                 |                    |
| The Northern Echo               | 1                                 |                    |

|                                   |                                      |    |
|-----------------------------------|--------------------------------------|----|
| <b>Canada (n=32)</b>              | <b>National</b>                      | 17 |
|                                   | <i>Quality</i>                       | 15 |
|                                   | The Globe and Mail                   | 4  |
|                                   | TheStar.com                          | 3  |
|                                   | Breaking News from globeandmail.com  | 1  |
|                                   | PostMedia Breaking News              | 3  |
|                                   | CBC News                             | 2  |
|                                   | The Toronto Star                     | 1  |
|                                   | The Vancouver Sun                    | 1  |
|                                   | <b>Tabloid</b>                       | 2  |
|                                   | Contify Investment News              | 1  |
|                                   | Lake Country Calendar                | 1  |
|                                   | <b>Regional</b>                      | 15 |
|                                   | Thespec.com (The Hamilton Spectator) | 3  |
|                                   | Ottawa Citizen                       | 2  |
|                                   | The Calgary Herald                   | 2  |
|                                   | Castlegar News                       | 1  |
|                                   | Sault Star                           | 1  |
|                                   | The Leader Post                      | 1  |
|                                   | Cold Lake Sun                        | 1  |
| Wetaskiwin Times Advertiser       | 1                                    |    |
| Times Colonist                    | 1                                    |    |
| Red Deer Advocate                 | 1                                    |    |
| Waterloo Region Record            | 1                                    |    |
| <b>USA (n=15)</b>                 | <b>National</b>                      | 2  |
|                                   | <i>Quality</i>                       | 2  |
|                                   | CNN.com                              | 1  |
|                                   | The New York Times                   | 1  |
|                                   | <b>Regional</b>                      | 13 |
|                                   | Contify Life Science News            | 5  |
|                                   | Richmond Times Dispatch              | 2  |
|                                   | Winsconsin State Journal             | 1  |
|                                   | Minnesota Daily                      | 1  |
|                                   | Kiplinger.com                        | 1  |
| LNP (Lancaster)                   | 1                                    |    |
| Philly.com                        | 1                                    |    |
| The Federick News-post (Maryland) | 1                                    |    |
| <b>Australia (n=14)</b>           | <b>National</b>                      | 8  |
|                                   | <i>Quality</i>                       | 6  |
|                                   | The Conversation                     | 2  |
|                                   | Australian Financial Review          | 2  |
|                                   | The Sydney Morning Herald            | 2  |
|                                   | <b>Tabloid</b>                       | 2  |
|                                   | Herald Sun Online                    | 1  |
|                                   | Herald Sun                           | 1  |
|                                   | <b>Regional</b>                      | 6  |
|                                   | Hobart Mercury                       | 2  |
| Mandurah Mail                     | 1                                    |    |

|                          |                                   |   |
|--------------------------|-----------------------------------|---|
|                          | Mackay Daily Mercury Online       | 1 |
|                          | Grenfell Record                   | 1 |
|                          | The Northern View                 | 1 |
| <b>Ireland (n=6)</b>     | <b>National</b>                   | 6 |
|                          | <i>Quality</i>                    | 4 |
|                          | Irish Examiner                    | 1 |
|                          | Irish Independent                 | 1 |
|                          | The Irish Times                   | 1 |
|                          | Sunday Independent                | 1 |
|                          | <i>Quality unknown</i>            | 2 |
|                          | The Irish News                    | 1 |
|                          | Irish Medical Times               | 1 |
| <b>Israel (n=1)</b>      | <b>National</b>                   | 1 |
|                          | <i>Quality</i>                    | 1 |
|                          | The Jerusalem Post Online Edition | 1 |
| <b>Other (n=4)</b>       | <b>National</b>                   | 4 |
|                          | <i>Quality unknown</i>            | 4 |
| <b>Uganda (n=1)</b>      | Daily Monitor                     | 1 |
| <b>India (n=1)</b>       | Indian Health Care News           | 1 |
| <b>New-Zealand (n=1)</b> | The New Zealand Herald            | 1 |
| <b>France (n=1)</b>      | La Croix International            | 1 |
