# Supplementary material for: Newspaper coverage of advance care planning during the COVID-19 pandemic: Content analysis
Source: PubMed Central journal article supplement — Death Stud. Author manuscript; Available in PMC 2024 Feb 16. (PMC10491734; doi:10.1080/07481187.2023.2180693), 2023-03-09
Supplement: NIHMS1896006-supplement-Supplemental_file_3.pdf [file NIHMS1896006-supplement-Supplemental_file_3.pdf]

### Supplemental file 3

#### *Overview of the use of terms related to advance care planning*

| <b>Terms</b>                                                    | <b>Number of articles</b> |
|-----------------------------------------------------------------|---------------------------|
| <b>Terms to describe “Advance care planning”</b>                |                           |
| Advance care planning                                           | 56                        |
| Advanced care planning                                          | 20                        |
| Advance-care planning                                           | 2                         |
| Advanced care plan conversations                                | 1                         |
| Advance care planning discussion(s)                             | 1                         |
| Advance planning                                                | 1                         |
| Advanced planning                                               | 1                         |
| Treatment and care planning                                     | 1                         |
| <b>Terms to describe “Advance directives”</b>                   |                           |
| Advance care plan(s)                                            | 40                        |
| Advanced care plan(s)                                           | 32                        |
| Advance directive(s)                                            | 8                         |
| Living will(s)                                                  | 8                         |
| Will(s)                                                         | 5                         |
| Treatment escalation plan(s)                                    | 4                         |
| Advanced directive(s)                                           | 3                         |
| Personal directive(s)                                           | 3                         |
| Advance care directive(s)                                       | 2                         |
| Advance care planning document(s)                               | 2                         |
| Advance decisions                                               | 2                         |
| Advance decision to refuse treatment (ADRT)                     | 2                         |
| Advance health care directive(s)                                | 2                         |
| Care plan                                                       | 2                         |
| Contingency plan                                                | 2                         |
| Medical directive                                               | 2                         |
| Advanced care directive(s)                                      | 1                         |
| Advance care planning documentation                             | 1                         |
| Advanced care planning documents                                | 1                         |
| Advance directive for medical care                              | 1                         |
| Advance directive policies                                      | 1                         |
| Advance healthcare plan                                         | 1                         |
| Advance healthcare planning                                     | 1                         |
| Advanced medical directive                                      | 1                         |
| Advanced planning document                                      | 1                         |
| Advance statement                                               | 1                         |
| Care directive(s)                                               | 1                         |
| Care document                                                   | 1                         |
| CPR decision form                                               | 1                         |
| DNAR                                                            | 1                         |
| Do not attempt cardiopulmonary resuscitation (DNACPR) documents | 1                         |
| Do not attempt resuscitation (DNACPR) decisions                 | 1                         |
| Do not attempt resuscitation letter                             | 1                         |
| Emergency plans to care                                         | 1                         |
| Estate plan                                                     | 1                         |

|                                                       |   |
|-------------------------------------------------------|---|
| Goals of care (GCD) order                             | 1 |
| Health-care directives                                | 1 |
| Health directives                                     | 1 |
| Holographic will                                      | 1 |
| Last will and testament                               | 1 |
| Medical orders of life sustaining treatment (MOLST)   | 1 |
| Personalised care plan(s)                             | 1 |
| Physician order for life sustaining treatment (POLST) | 1 |
| ReSPECT forms                                         | 1 |
| The file for goals of care                            | 1 |
| <hr/>                                                 |   |
| <b>Terms to describe “personal representative”</b>    |   |
| <hr/>                                                 |   |
| Substitute decision maker(s)                          | 9 |
| Power of attorney                                     | 7 |
| Decision maker                                        | 4 |
| Health care proxy                                     | 3 |
| Financial power of attorney                           | 2 |
| Lasting power of attorney (LPA)                       | 2 |
| Power of attorney for personal care                   | 2 |
| Agent                                                 | 1 |
| Alternate decision maker                              | 1 |
| Appointment of a trusted person                       | 1 |
| Attorney                                              | 1 |
| Deputies                                              | 1 |
| Durable power of attorney                             | 1 |
| Enduring power of attorney                            | 1 |
| Health care agent                                     | 1 |
| Medical decision maker                                | 1 |
| Medical power of attorney                             | 1 |
| Patient advocate designation                          | 1 |
| Power of attorney documents                           | 1 |
| Surrogate decision maker                              | 1 |
| (Your) advocate                                       | 1 |
| <hr/>                                                 |   |
| <b>Terms related to end-of-life care</b>              |   |
| <hr/>                                                 |   |
| End of life plan(s)                                   | 4 |
| End-of-life conversation                              | 3 |
| End of life care plan                                 | 2 |
| Decision-making capacity                              | 1 |
| End of life care decisions                            | 1 |
| End of life care decision document                    | 1 |
| End of life discussions                               | 1 |
| End of life documents                                 | 1 |
| End of life instructions                              | 1 |
| End of life planning                                  | 1 |
| End of life preferences                               | 1 |
| End of life wishes                                    | 1 |
| Personalised end of life plan(s)                      | 1 |
| Voluntary assisted dying (VAD)                        | 1 |
| <hr/>                                                 |   |
